# Supplementary material for: Efficiency of chlorine and UV in the inactivation of Cryptosporidium and Giardia in wastewater
Source: PubMed Central journal article supplement (PMC6513095; doi:10.1371/journal.pone.0216040), 2019-05-13
Supplement: pone.0216040.s001.pdf [file pone.0216040.s001.pdf]

# BD FACSDiva 8.0.1

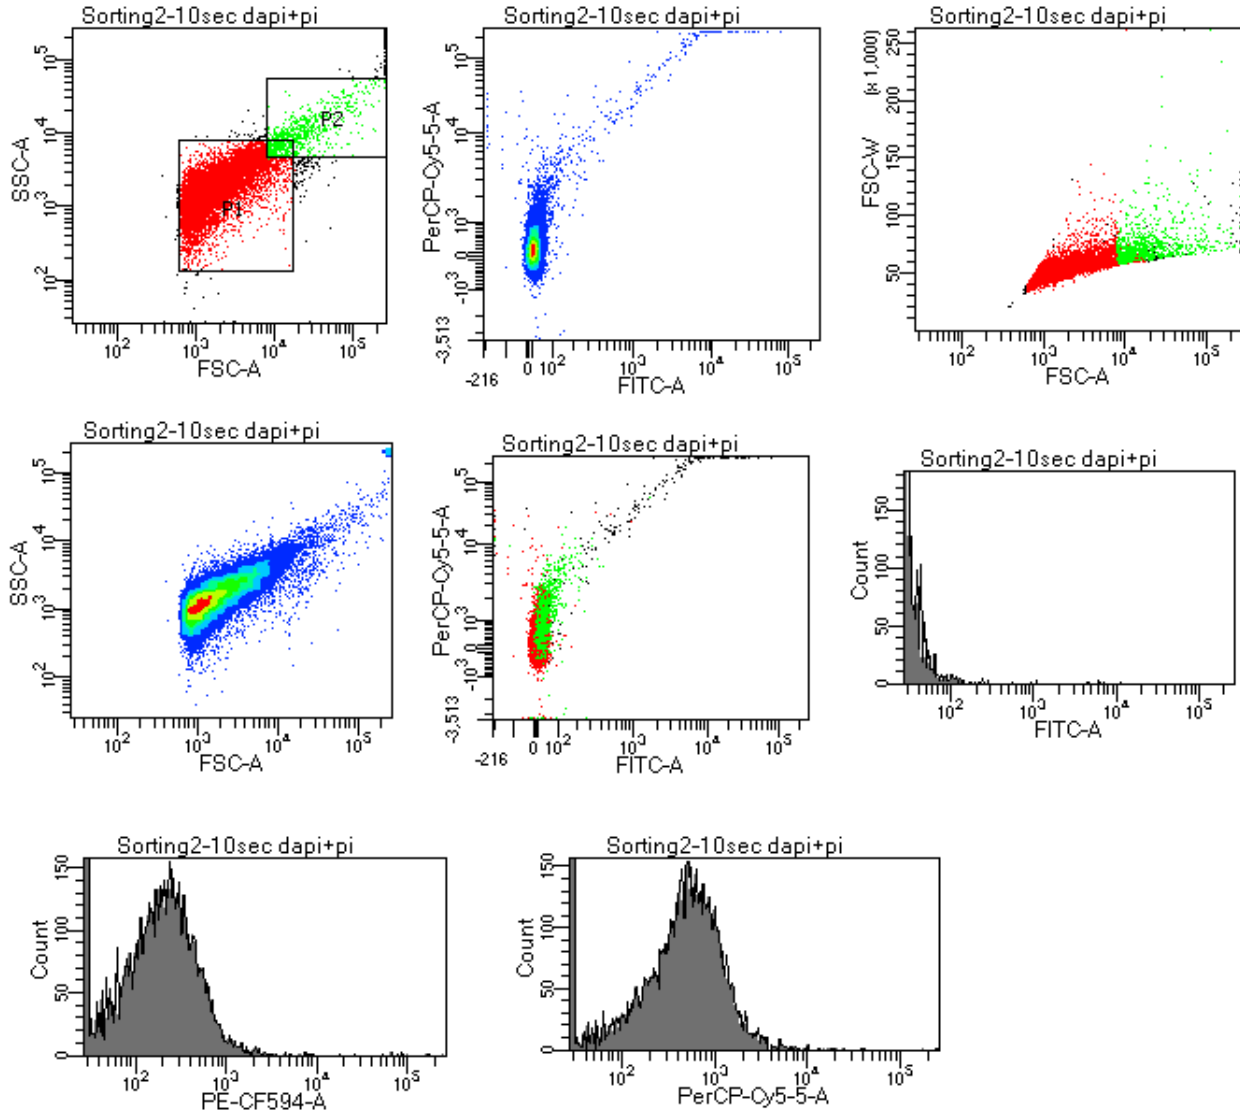

Tube: 10sec dapi+pi

| Population | #Events | %Parent | %Total |
|------------|---------|---------|--------|
| All Events | 10,000  | ####    | 100.0  |
| P1         | 5,661   | 56.6    | 56.6   |
| P2         | 4,324   | 43.2    | 43.2   |

# BD FACSDiva 8.0.1

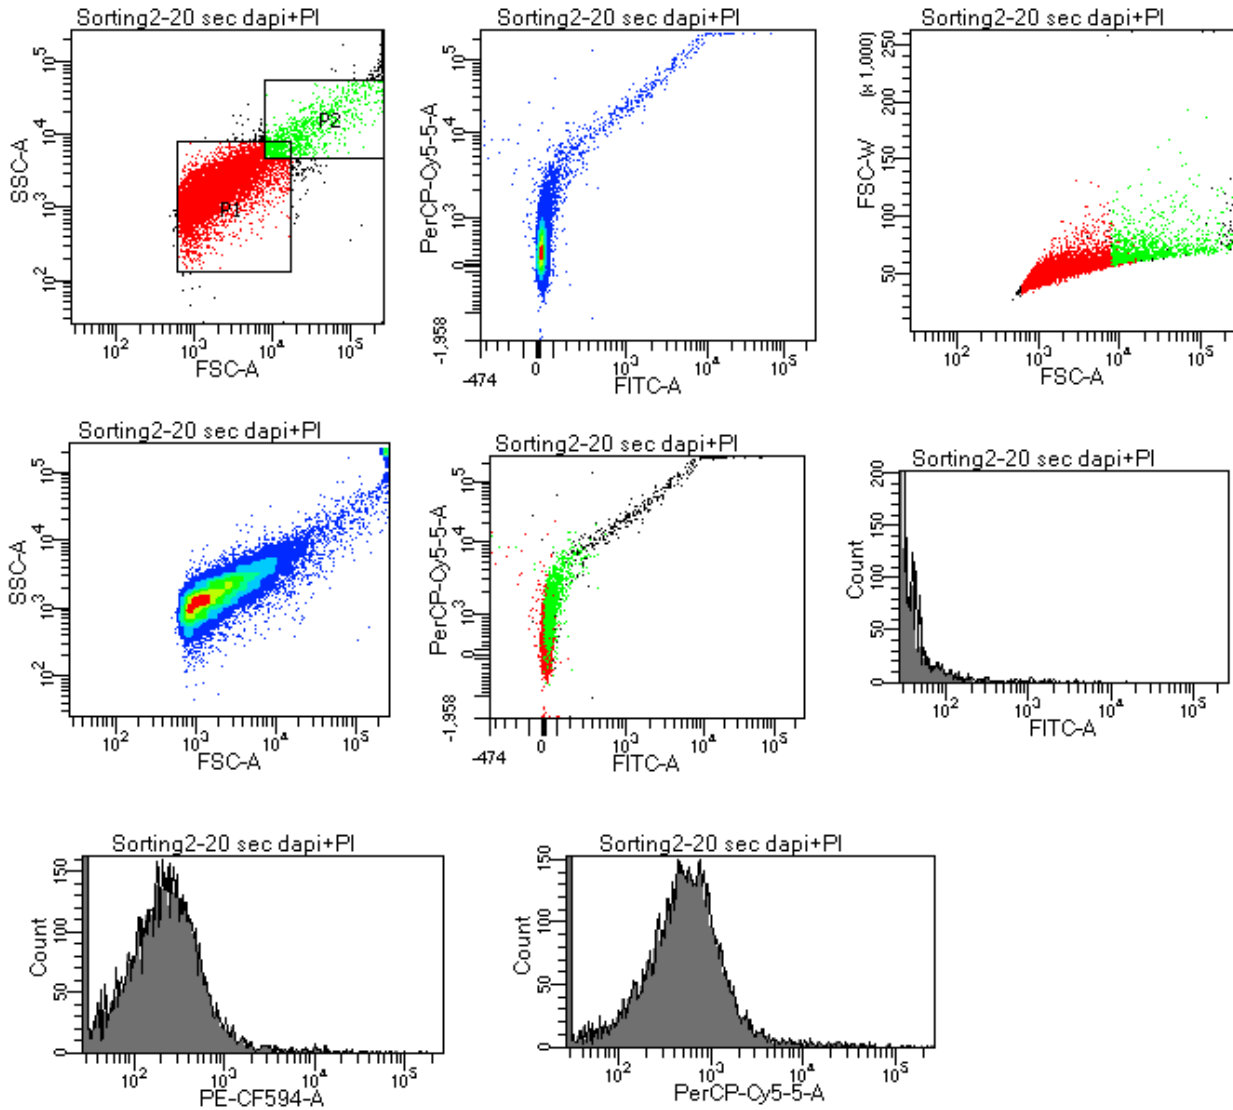

Tube: 20 sec dapi+PI

| Population | #Events | %Parent | %Total |
|------------|---------|---------|--------|
| All Events | 10,000  | ####    | 100.0  |
| P1         | 8,827   | 88.3    | 88.3   |
| P2         | 1,102   | 11.0    | 11.0   |

# BD FACSDiva 8.0.1

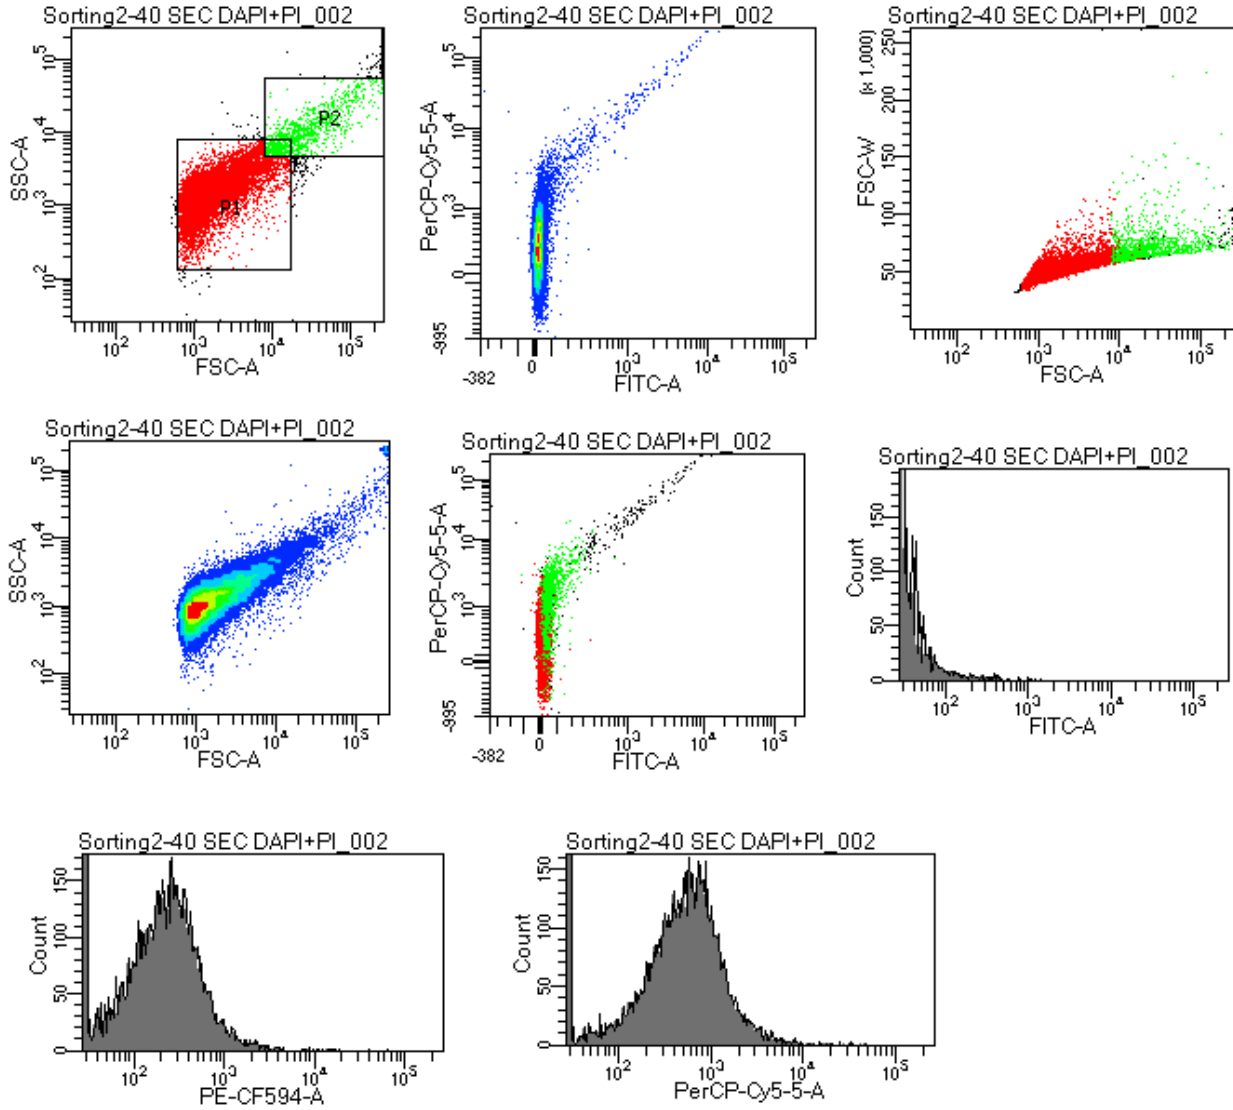

Tube: 40 SEC DAPI+PI\_002

| Population | #Events | %Parent | %Total |
|------------|---------|---------|--------|
| All Events | 10,000  | ####    | 100.0  |
| P1         | 8,997   | 90.0    | 90.0   |
| P2         | 985     | 9.8     | 9.8    |

# BD FACSDiva 8.0.1

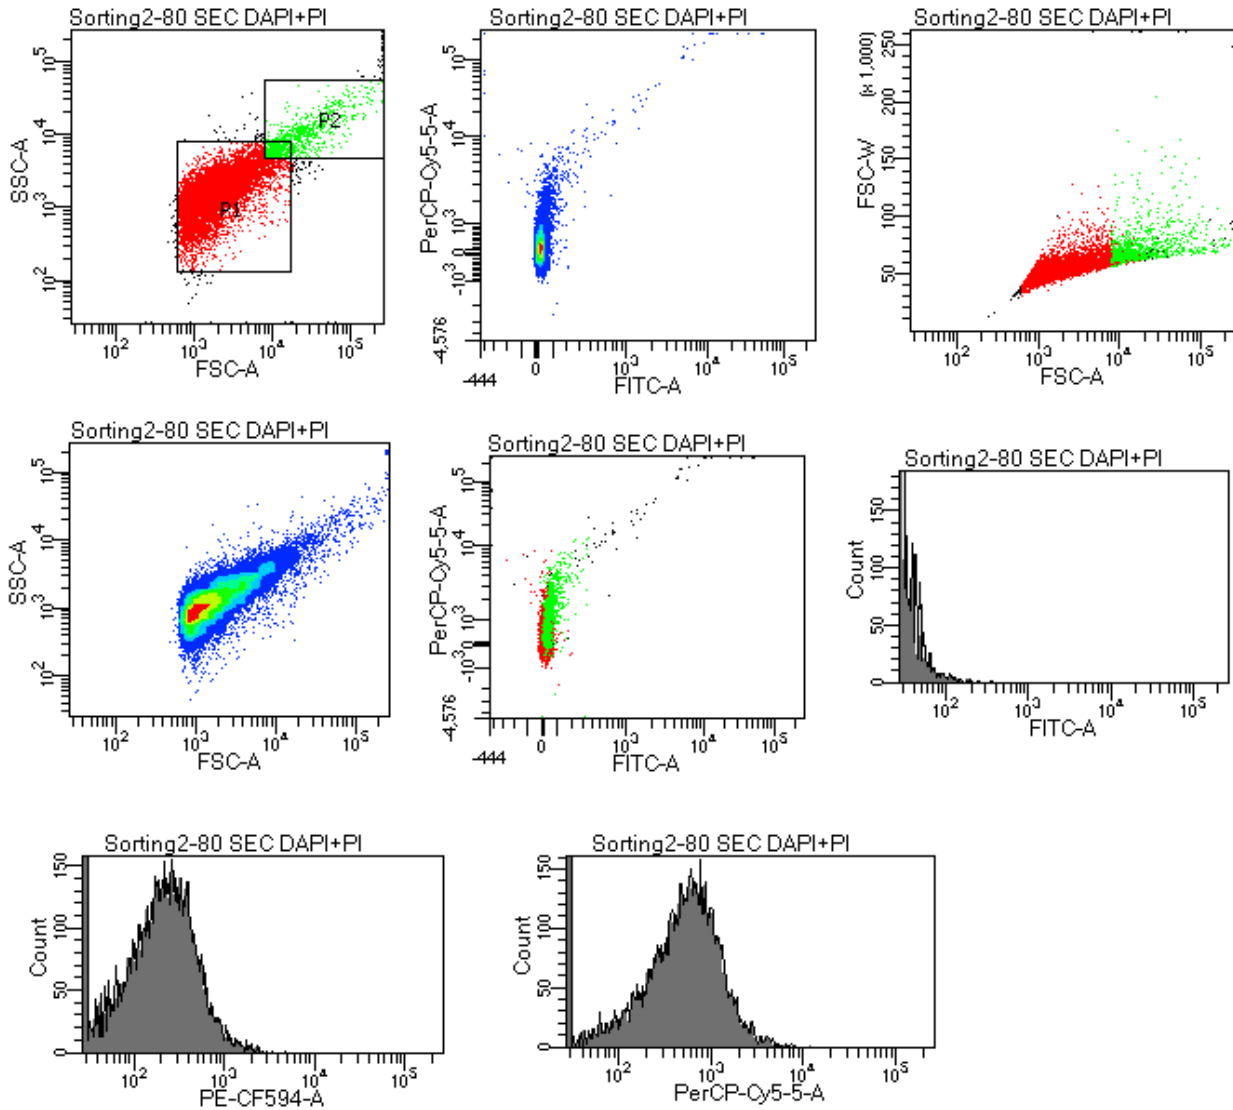

Tube: 80 SEC DAPI+PI

| Population | #Events | %Parent | %Total |
|------------|---------|---------|--------|
| All Events | 10,000  | ####    | 100.0  |
| P1         | 9,323   | 93.2    | 93.2   |
| P2         | 854     | 8.5     | 8.5    |

BD FACSDiva 8.0.1

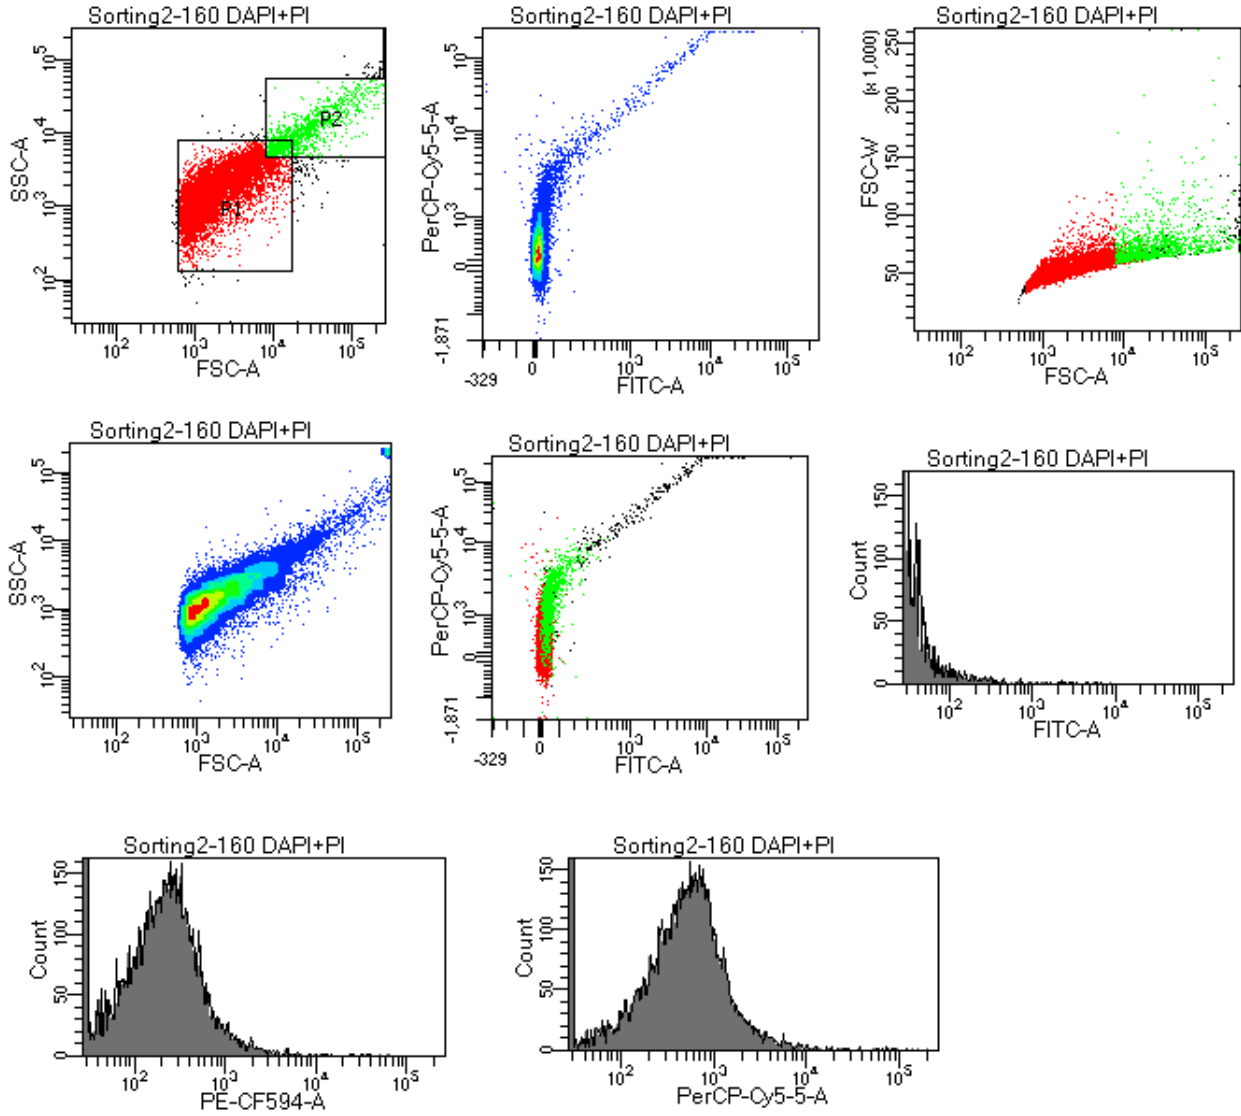

Tube: 160 DAPI+PI

| Population | #Events | %Parent | %Total |
|------------|---------|---------|--------|
| All Events | 10,000  | ####    | 100.0  |
| P1         | 9,783   | 97.8    | 97.8   |
| P2         | 3,114   | 3.1     | 3.1    |

# BD FACSDiva 8.0.1

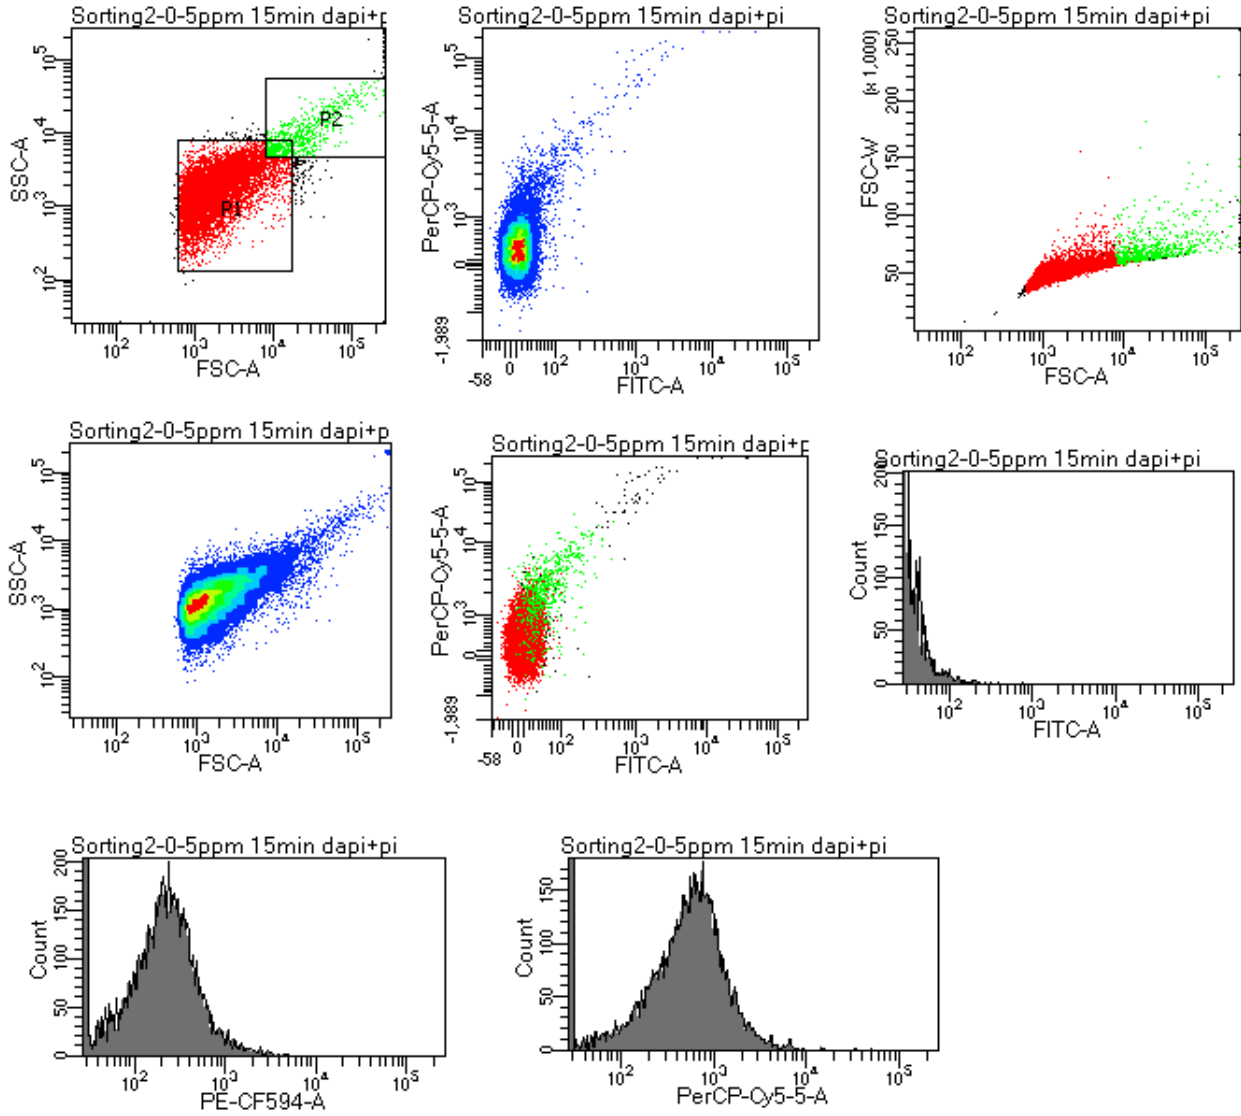

Tube: 0-5ppm 15min dapi+pi

| Population | #Events | %Parent | %Total |
|------------|---------|---------|--------|
| All Events | 10,000  | ####    | 100.0  |
| P1         | 1,612   | 16.1    | 16.1   |
| P2         | 8,323   | 83.2    | 83.2   |

# BD FACSDiva 8.0.1

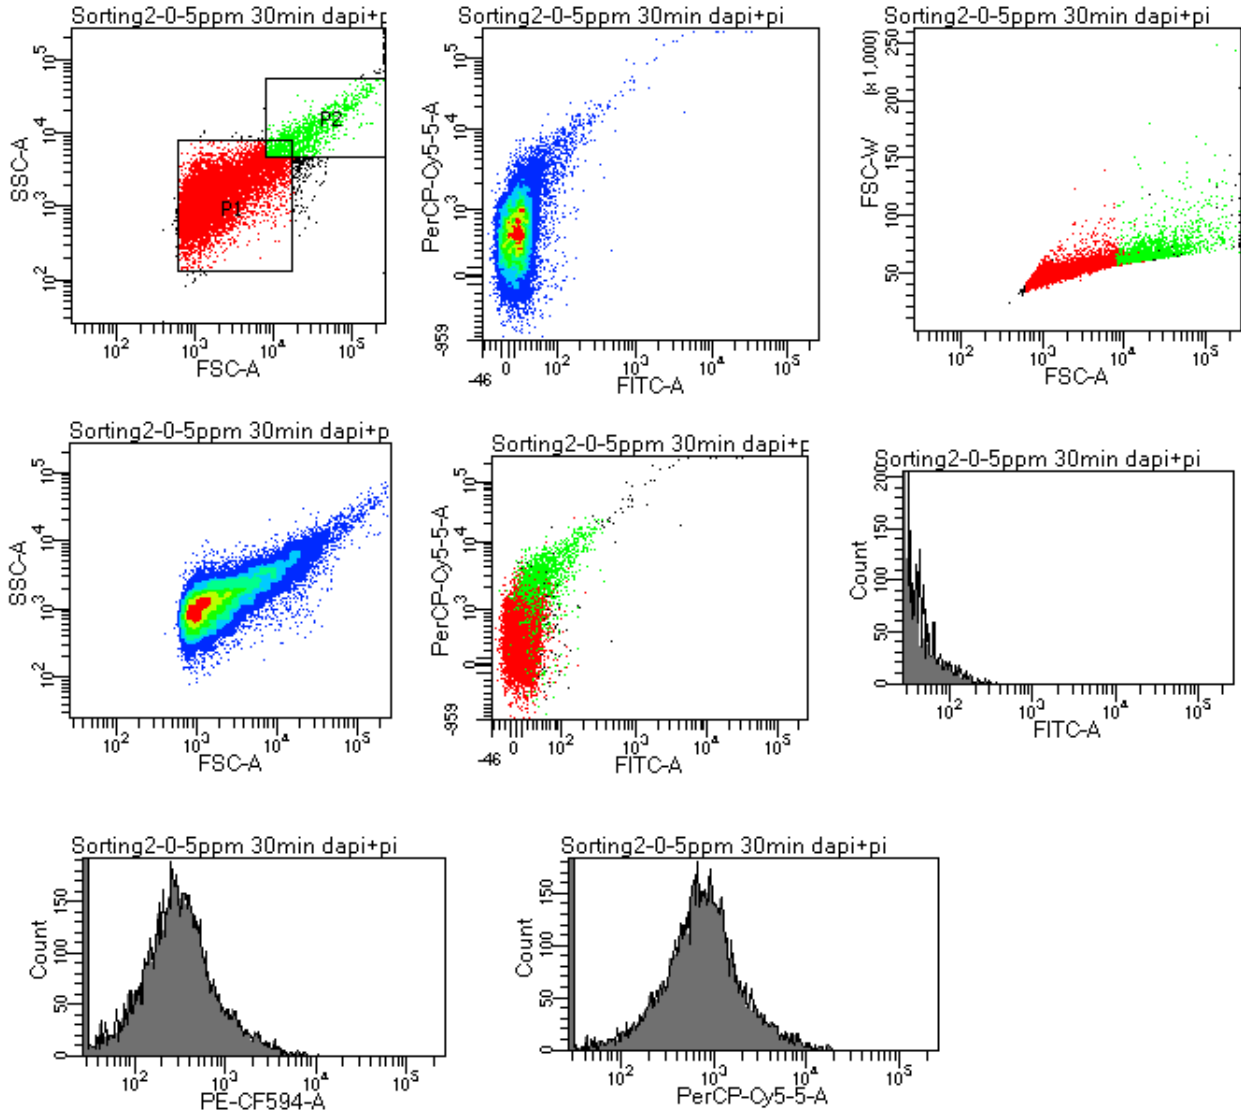

Tube: 0-5ppm 30min dapi+pi

| Population | #Events | %Parent | %Total |
|------------|---------|---------|--------|
| All Events | 10,000  | ####    | 100.0  |
| P1         | 2,211   | 22.1    | 22.1   |
| P2         | 7,991   | 79.9    | 79.9   |

# BD FACSDiva 8.0.1

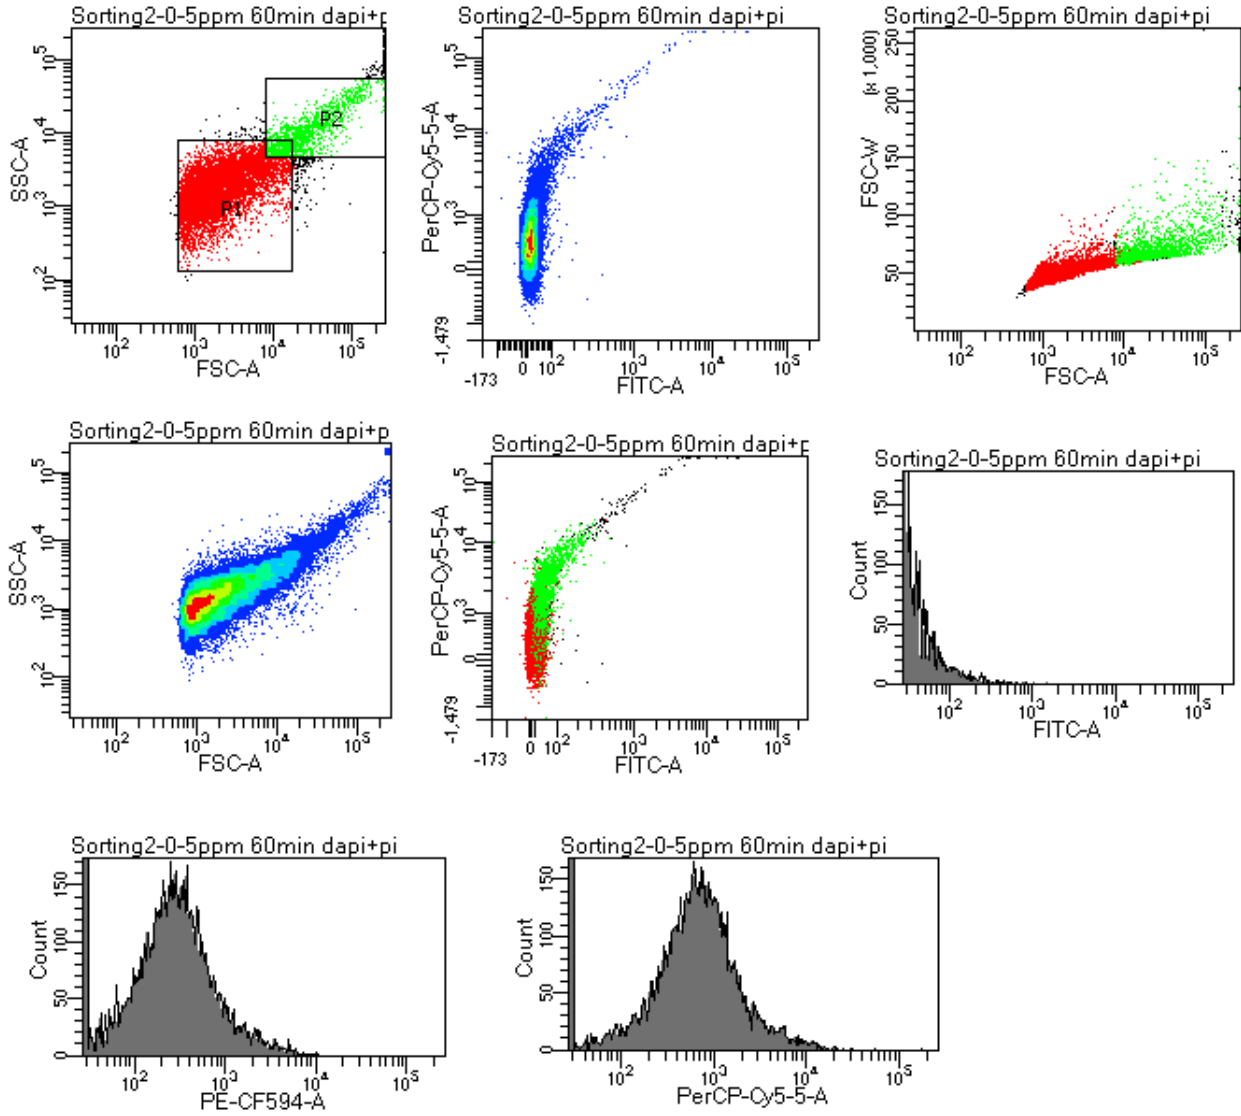

Tube: 0-5ppm 60min dapi+pi

| Population | #Events | %Parent | %Total |
|------------|---------|---------|--------|
| All Events | 10,000  | ####    | 100.0  |
| P1         | 3,011   | 30.1    | 30.1   |
| P2         | 7,164   | 71.6    | 71.6   |



# BD FACSDiva 8.0.1

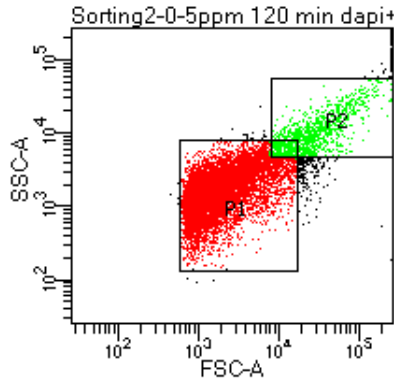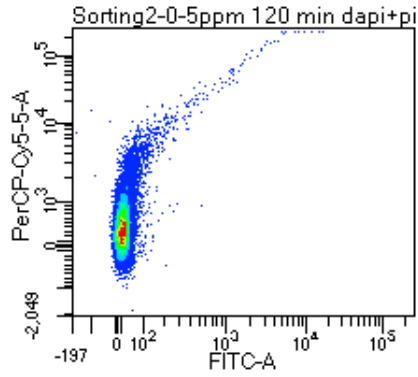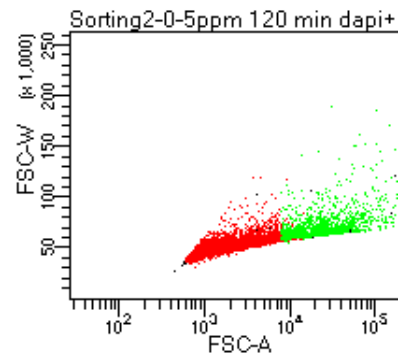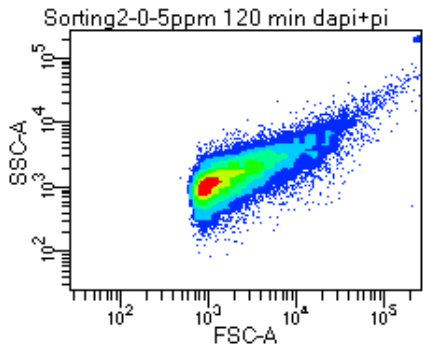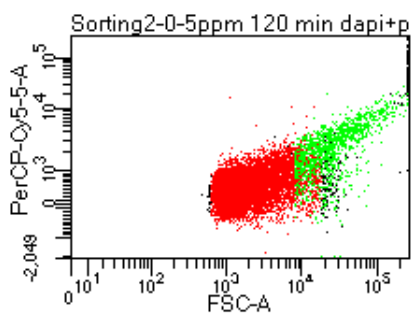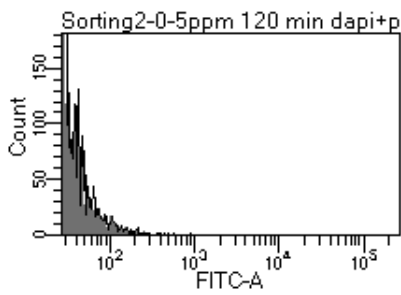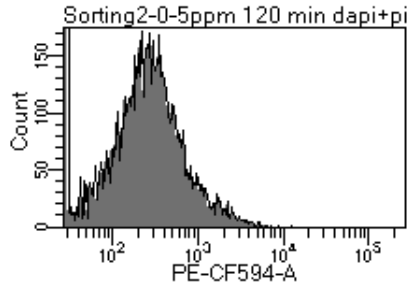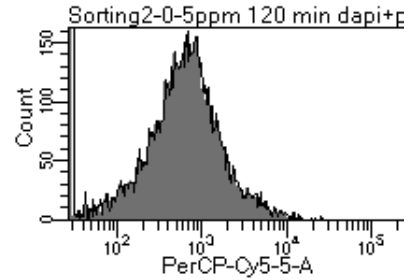

| Tube: 0-5ppm 120 min dapi+pi |         |         |        |
|------------------------------|---------|---------|--------|
| Population                   | #Events | %Parent | %Total |
| All Events                   | 10,000  | ####    | 100.0  |
| P1                           | 3,372   | 33.7    | 33.7   |
| P2                           | 6,713   | 67.1    | 67.1   |

# BD FACSDiva 8.0.1

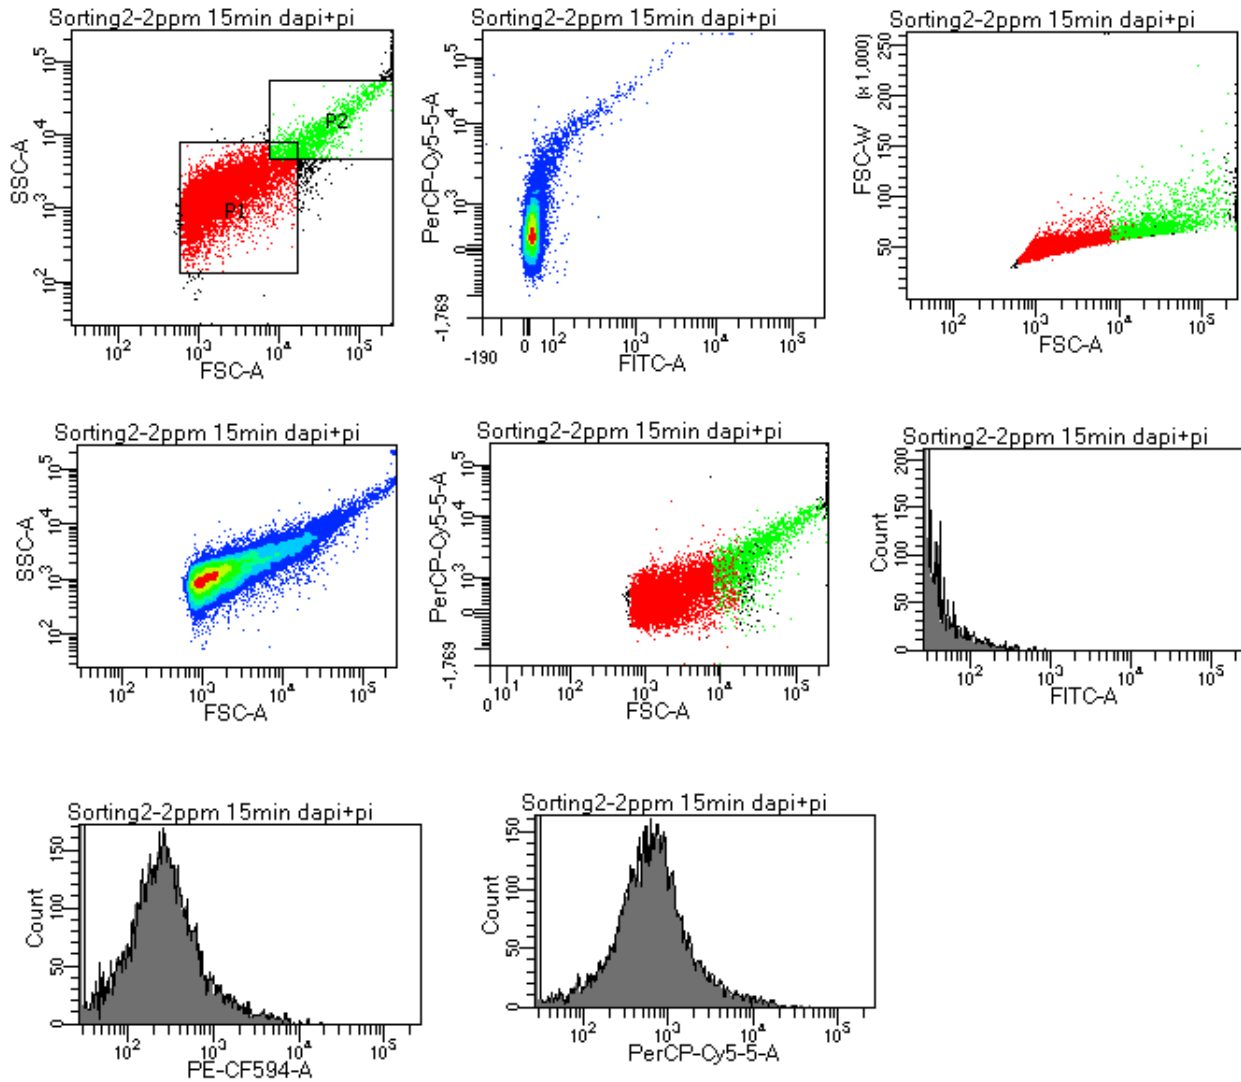

Tube: 2ppm 15min dapi+pi

| Population | #Events | %Parent | %Total |
|------------|---------|---------|--------|
| All Events | 10,000  | ####    | 100.0  |
| P1         | 1,387   | 13.9    | 13.9   |
| P2         | 8,621   | 86.2    | 86.2   |

# BD FACSDiva 8.0.1

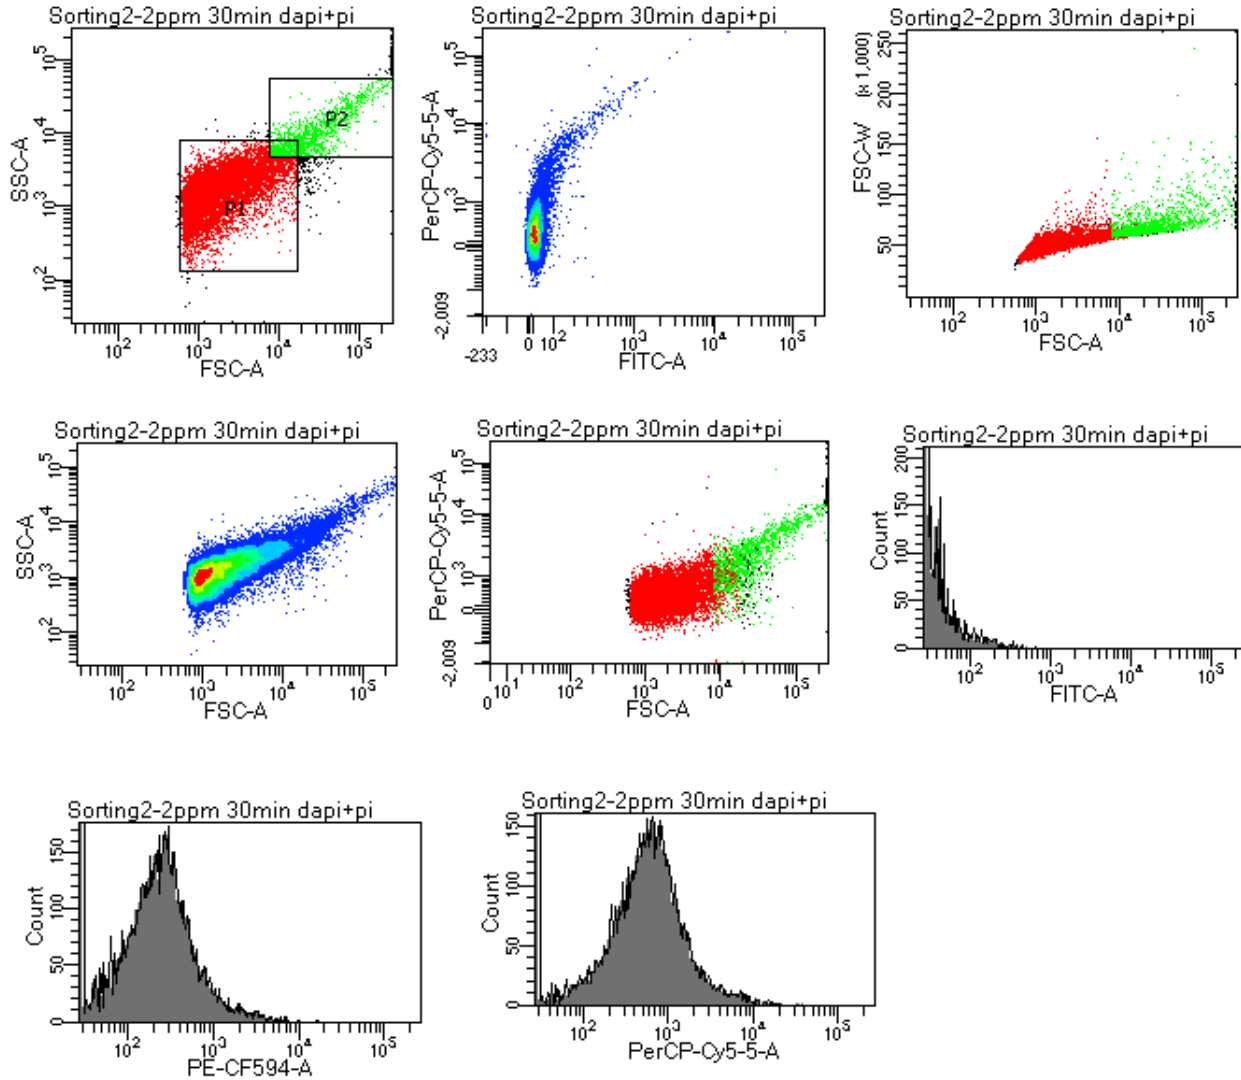

Tube: 2ppm 30min dapi+pi

| Population | #Events | %Parent | %Total |
|------------|---------|---------|--------|
| All Events | 10,000  | ####    | 100.0  |
| P1         | 2,922   | 29.2    | 29.2   |
| P2         | 7,163   | 71.6    | 71.6   |

# BD FACSDiva 8.0.1

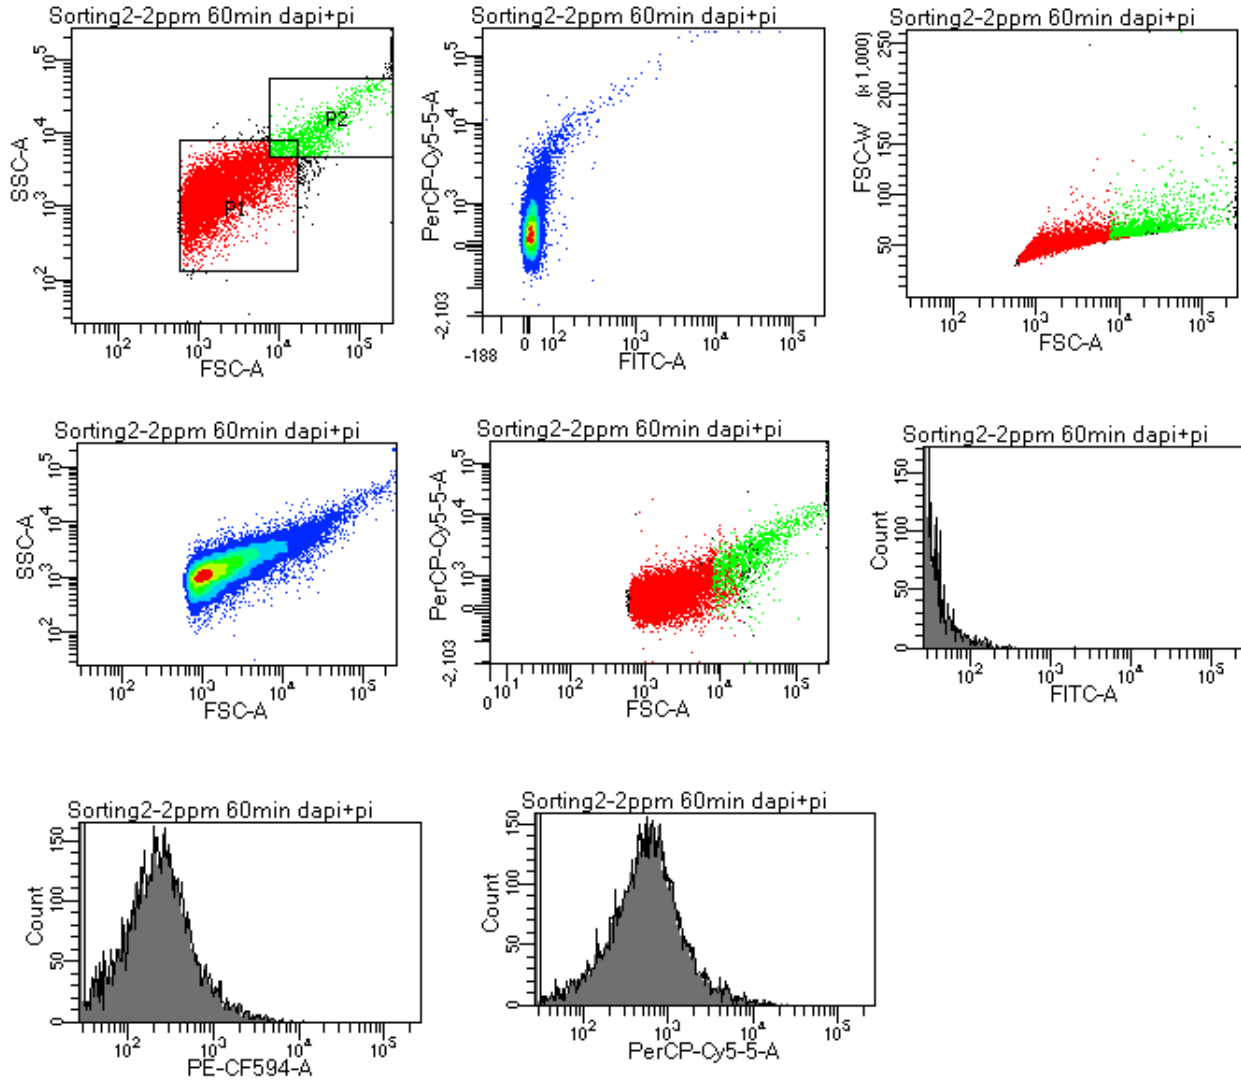

Tube: 2ppm 60min dapi+pi

| Population | #Events | %Parent | %Total |
|------------|---------|---------|--------|
| All Events | 10,000  | ####    | 100.0  |
| P1         | 3,331   | 33.3    | 33.3   |
| P2         | 6,770   | 67.7    | 67.7   |

# BD FACSDiva 8.0.1

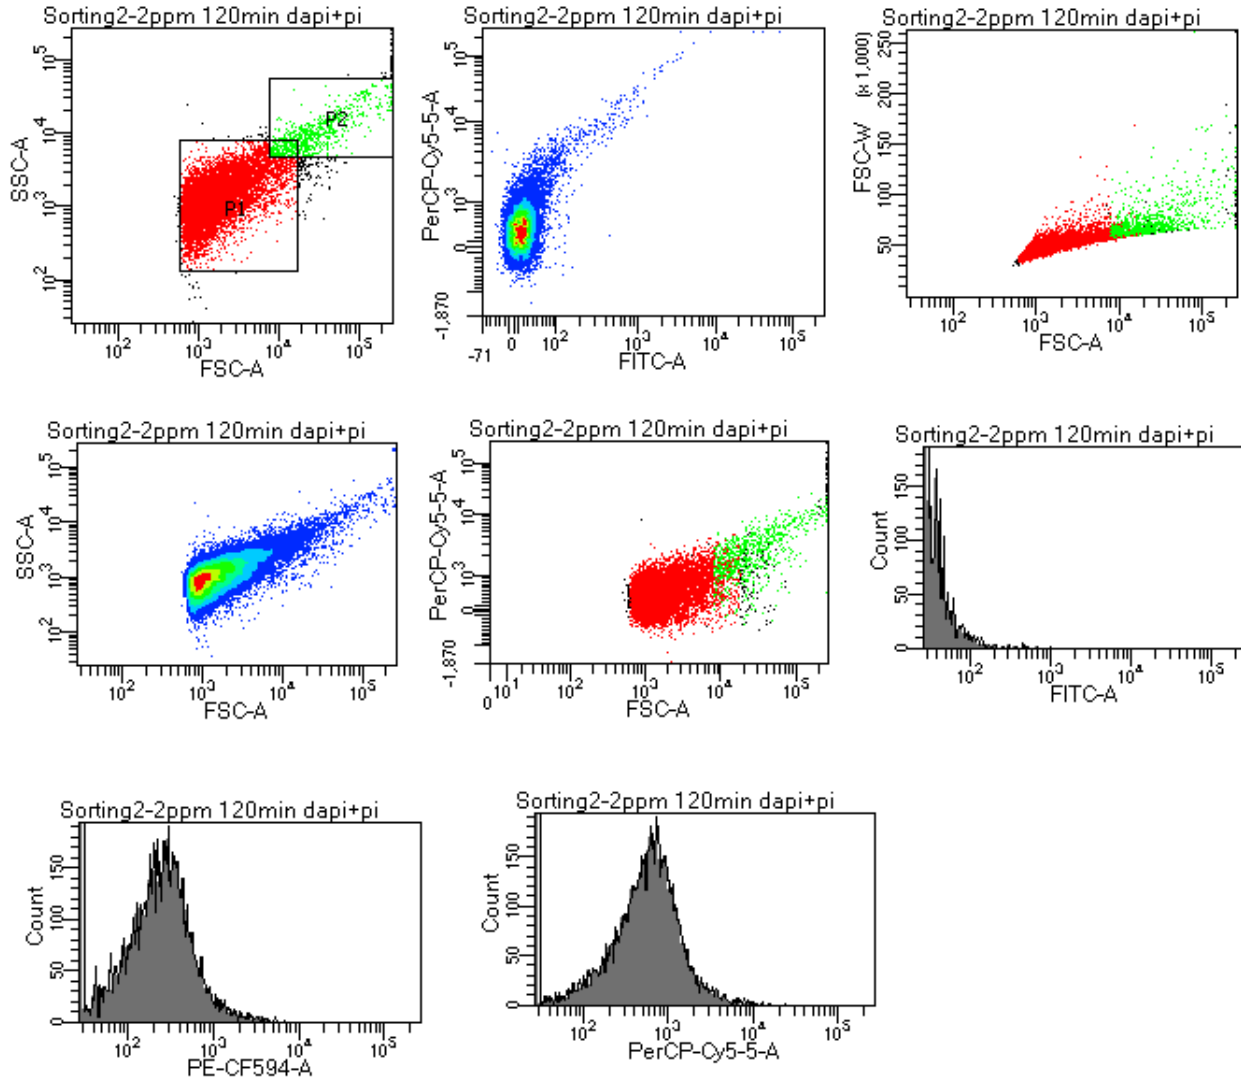

Tube: 2ppm 120min dapi+pi

| Population | #Events | %Parent | %Total |
|------------|---------|---------|--------|
| All Events | 10,000  | ####    | 100.0  |
| P1         | 4,241   | 42.4    | 42.4   |
| P2         | 5,754   | 57.5    | 57.5   |

# BD FACSDiva 8.0.1

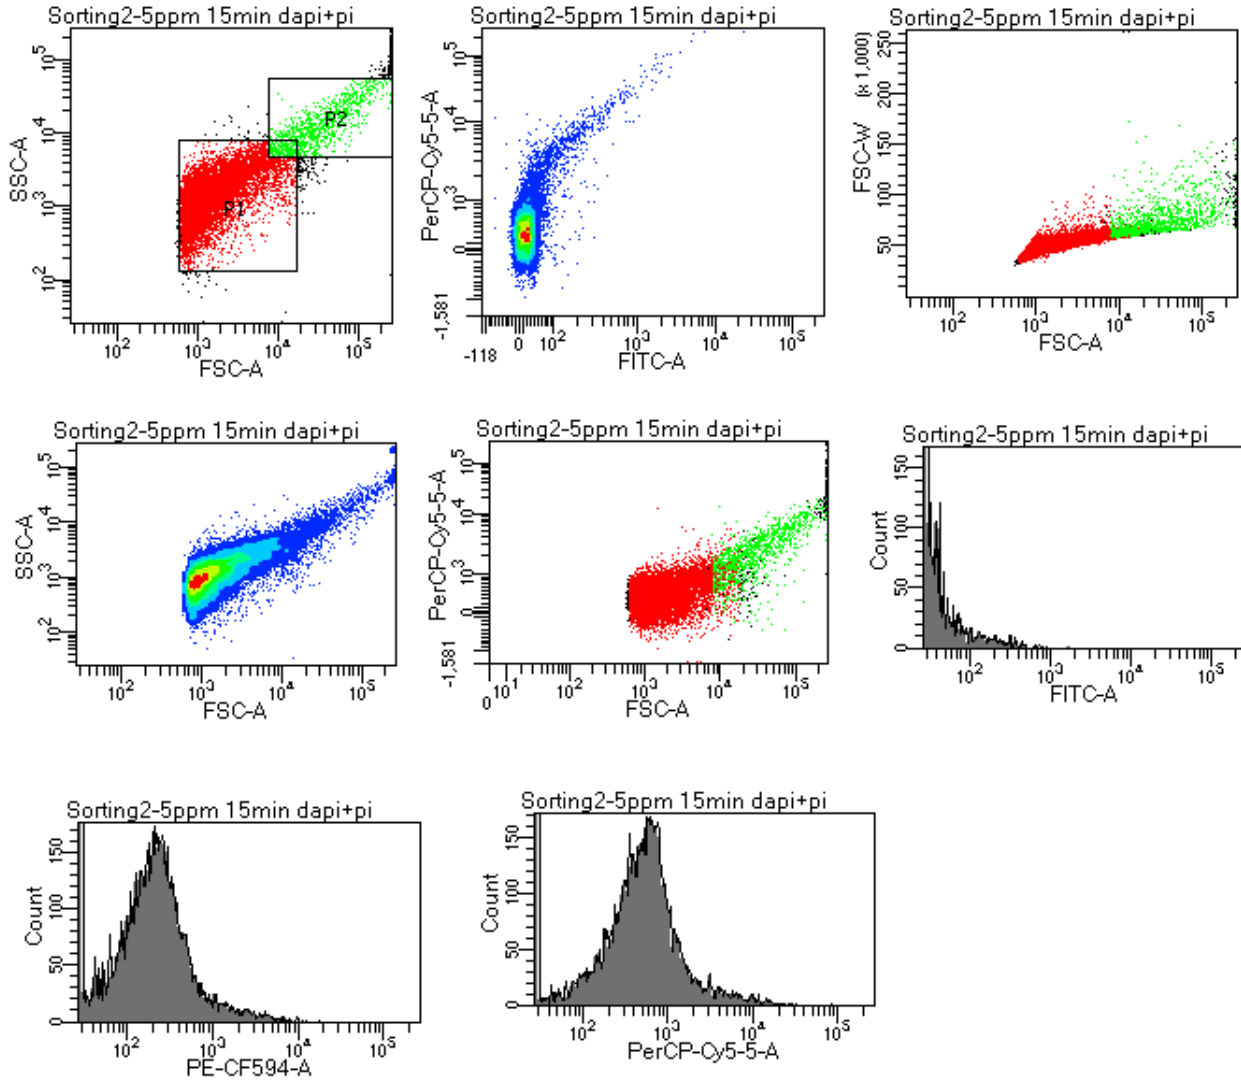

| Tube: 5ppm 15min dapi+pi |         |         |        |
|--------------------------|---------|---------|--------|
| Population               | #Events | %Parent | %Total |
| All Events               | 10,000  | ####    | 100.0  |
| P1                       | 5,817   | 58.2    | 58.2   |
| P2                       | 4,168   | 41.7    | 41.7   |

# BD FACSDiva 8.0.1

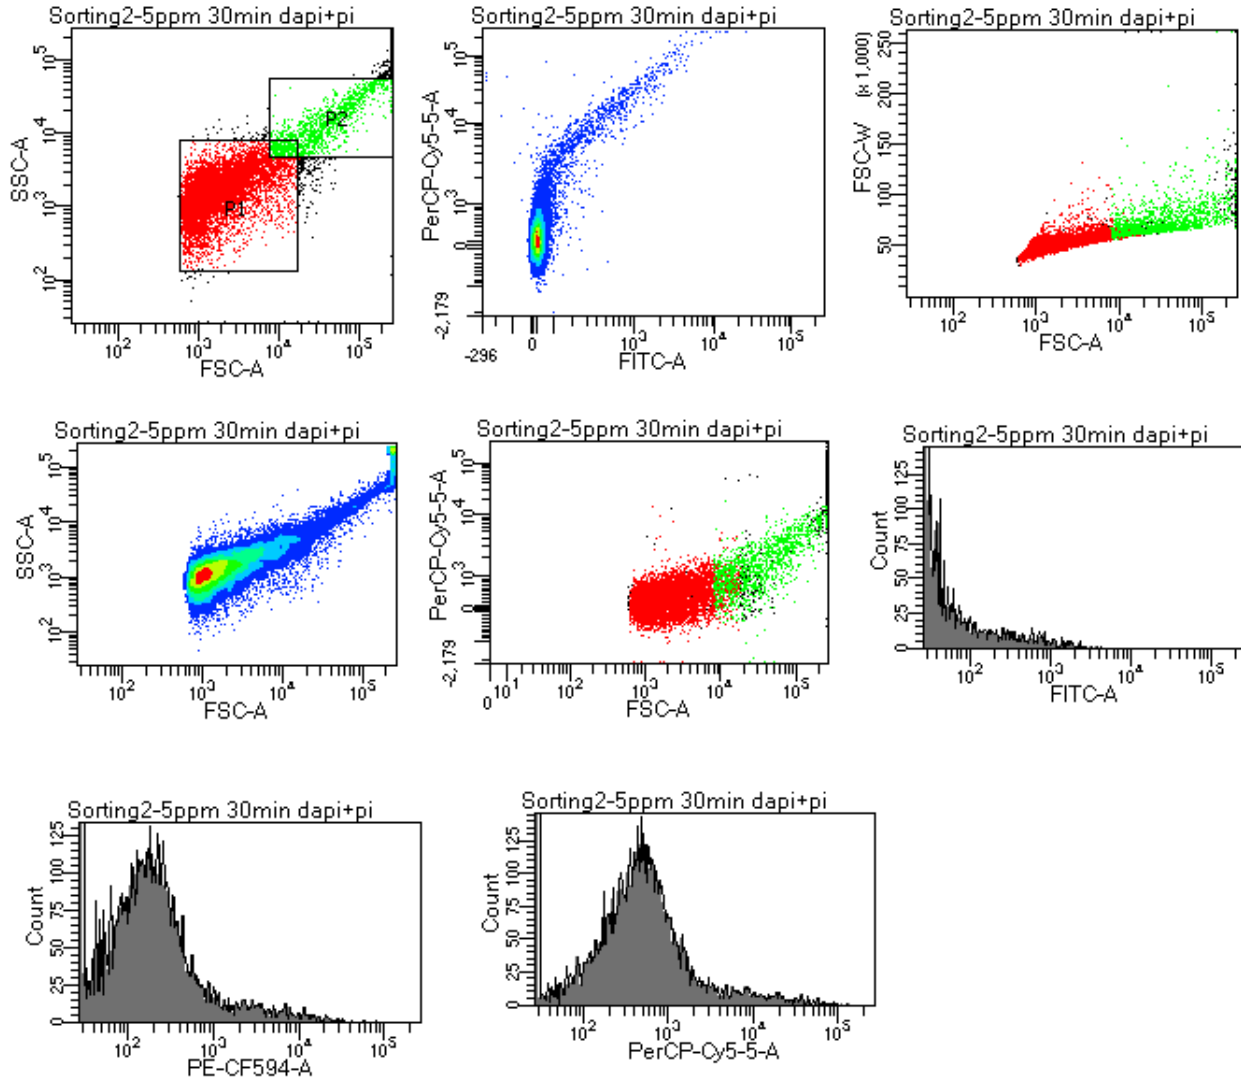

Tube: 5ppm 30min dapi+pi

| Population | #Events | %Parent | %Total |
|------------|---------|---------|--------|
| All Events | 10,000  | ####    | 100.0  |
| P1         | 6,327   | 63.3    | 63.3   |
| P2         | 3,298   | 33.0    | 33.0   |

# BD FACSDiva 8.0.1

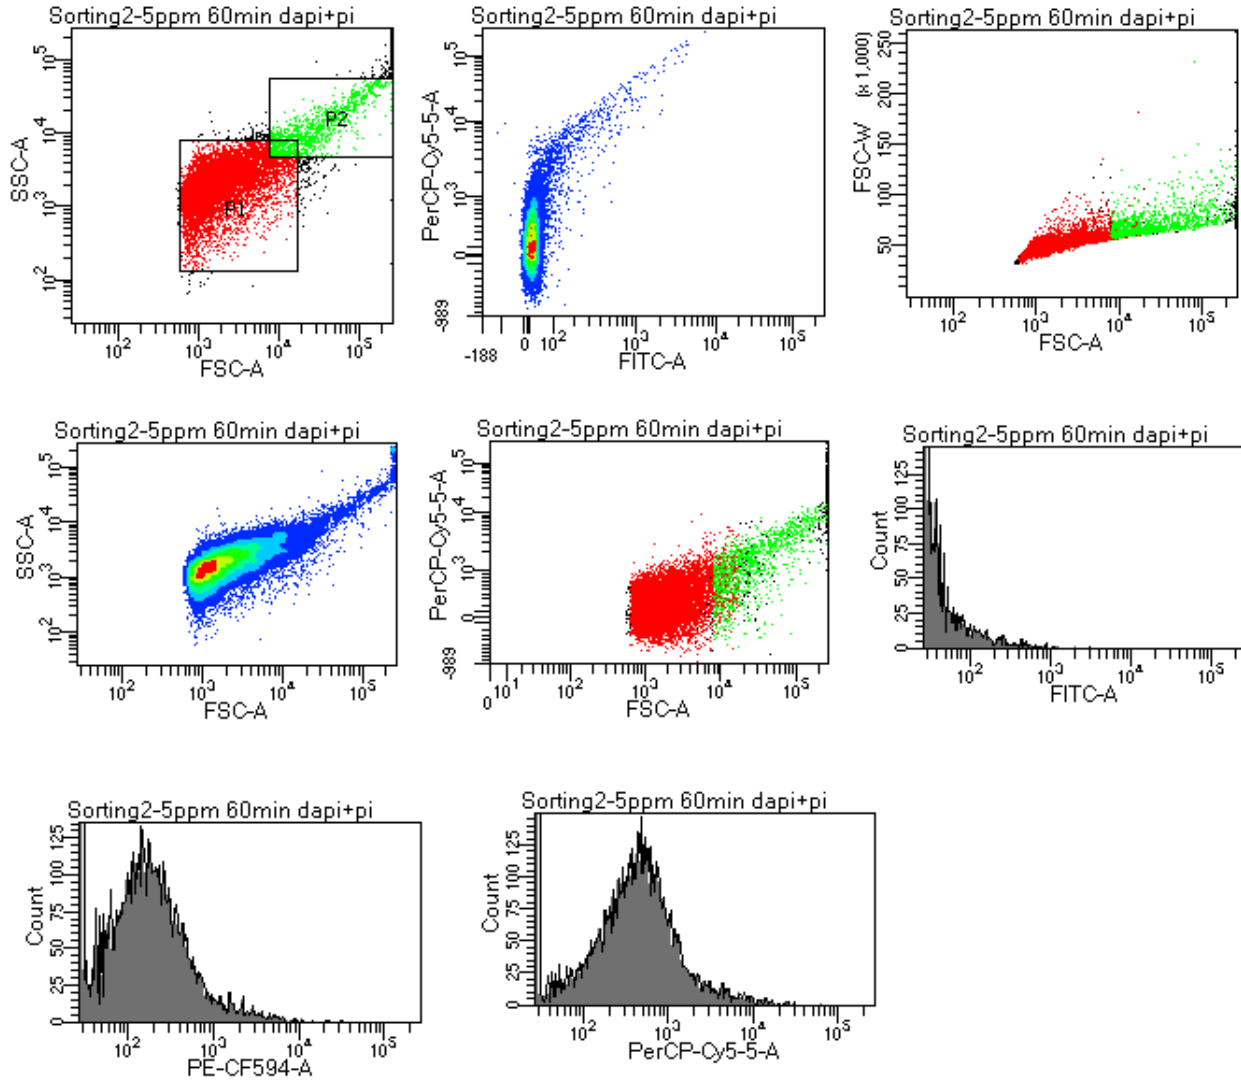

Tube: 5ppm 60min dapi+pi

| Population | #Events | %Parent | %Total |
|------------|---------|---------|--------|
| All Events | 10,000  | ####    | 100.0  |
| P1         | 7,771   | 77.7    | 77.7   |
| P2         | 2,127   | 21.3    | 21.3   |



# BD FACSDiva 8.0.1

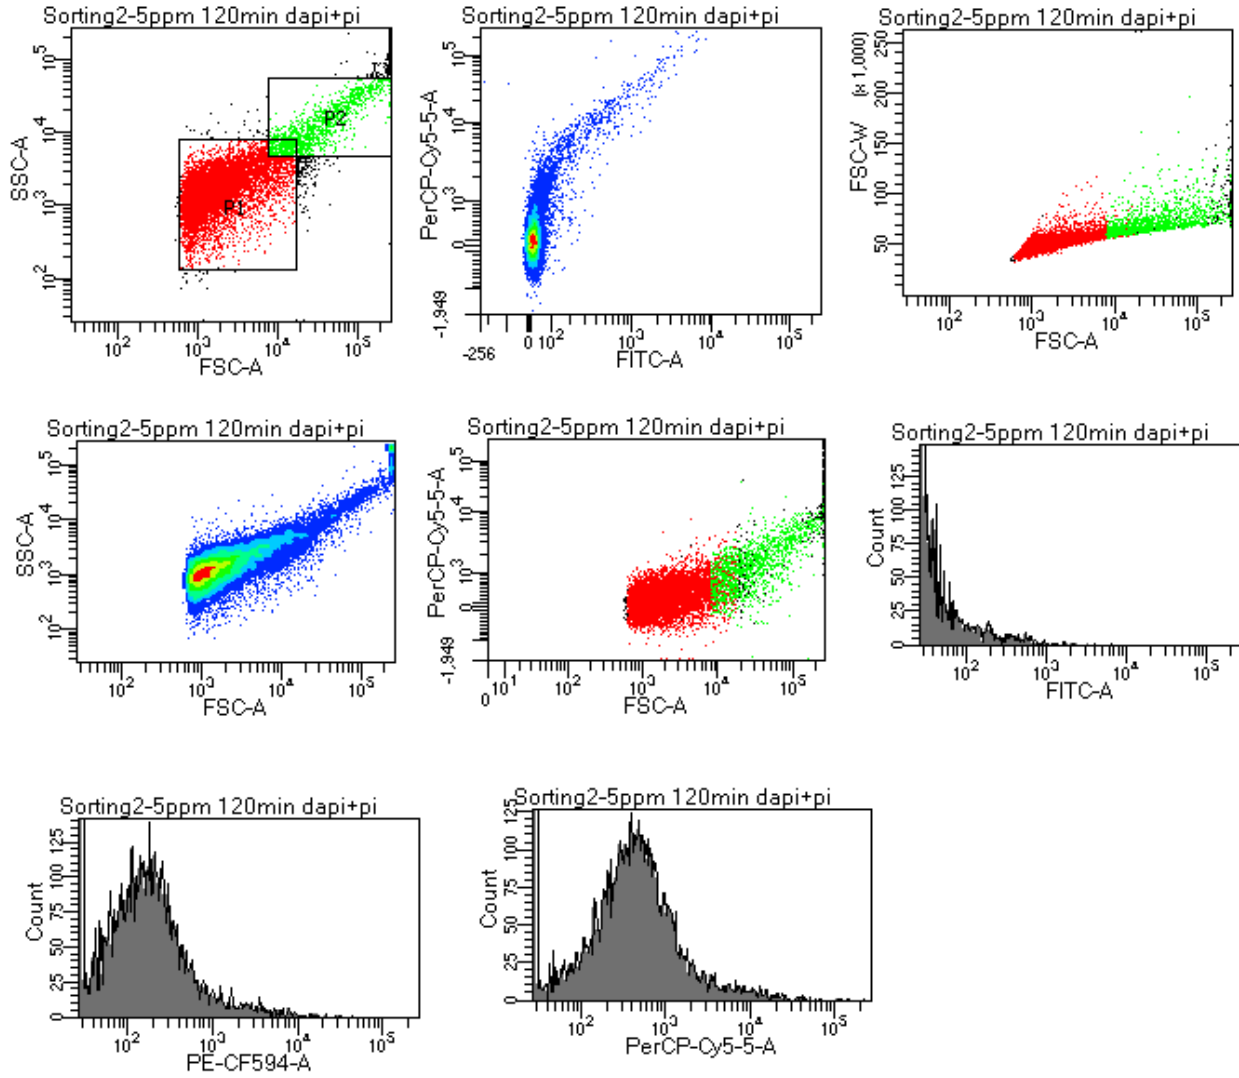

Tube: 5ppm 120min dapi+pi

| Population | #Events | %Parent | %Total |
|------------|---------|---------|--------|
| All Events | 10,000  | ####    | 100.0  |
| P1         | 8,553   | 85.5    | 85.5   |
| P2         | 1,265   | 12.6    | 12.6   |
